# Supplementary material for: Integrative Analysis of Three RNA Sequencing Methods Identifies Mutually Exclusive Exons of MADS-Box Isoforms During Early Bud Development in Picea abies
Source: Front Plant Sci. 2018 Nov 13;9:1625. doi: 10.3389/fpls.2018.01625 (PMC6243048; doi:10.3389/fpls.2018.01625)
Supplement: Supplementary file 1 [file Table_1.XLSX]

## Sheet: Summary
	This document contains Supplemental Tables S1 to S6
	Name of table	Note	Link
	Supplemental Table1 RNaseq_samples		SupTS1_RNAseq_samples_ - Supple
	Supplemental Table S2A Cloning_primers		SupTS2_Primers_ - Supplemental
	Supplemental Table S2B 5’RACE_primers		SupTS2_Primers_ - Supplemental1
	Supplemental Table S2C 3’RACE_primers		SupTS2_Primers_ - Supplemental2
	Supplemental Table2D qRT-PCR		SupTS2_Primers_ - Supplemental3
	Supplemental Table2E LAN-probes		SupTS2_Primers_ - Supplemental4
	Supplemental Table S3 Core_sequences		SupT3_core_sequences_ - Supplem
	Supplemental Table S4[Accession_numbers]		SupT4_Accession_numbers_ - Supp
	Supplemental Table S5 Amplification of DAL19 α-, β-, δ-, γ-containing transcripts	(-) sign indicate low or no amplification in the sample, (+) sign indicate amplification in sample.	SupT5 _Acrocona expression_ - S
	Supplemental Table S6 [diff expr]	The columns logFC.sm.SexM and logFC.sm.SexVL represent the log2-fold change between male and female, and vegetative and female expression levels, respectively. logCPM is the log2 average abundance of transcripts across all samples. The columns F, pval, and qval are the F statistic, its corresponding p-value, and the FDR-corrected significance level, respectively, of a test of equal expression lev…	SupT_diff_exp_ - Supplemental T

## Sheet: SupTS1_RNAseq_samples_ - Supple
Supplemental Table1 RNaseq_samples
Sample name	Accession	Description
M1a-08-01	ERS2545025	Male cone meristem of wild-type genotype sampled on Aug 1st 2016
M1b-08-01	ERS2545026	Male cone meristem of wild-type genotype sampled on Aug 1st 2016
M1c-08-01	ERS2545027	Male cone meristem of wild-type genotype sampled on Aug 1st 2016
F1a-08-01	ERS2545028	Female cone meristem of wild-type genotype sampled on Aug 1st 2016
F1b-08-01	ERS2545029	Female cone meristem of wild-type genotype sampled on Aug 1st 2016
F1c-08-01	ERS2545030	Female cone of wild-type genotype sampled on Aug 1st 2016
VL1a-08-01	ERS2545031	Vegetative shoot meristem of wild-type genotype sampled on Aug 1st 2016
VL1b-08-01	ERS2545032	Vegetative shoot meristem of wild-type genotype sampled on Aug 1st 2016
VL1c-08-01	ERS2545033	Vegetative shoot meristem of wild-type genotype sampled on Aug 1st 2016
V3-08-18	ERS2545034	Vegetative shoot meristem of wild-type genotype sampled on Aug 16th 2015
33_Pabies_IsoSeq	ERX2657687, ERX2657688	Pooled P. abies samples including male, female and vegetative buds, from several trees under several conditions

## Sheet: SupTS2_Primers_ - Supplemental 
Supplemental Table S2A Cloning_primers
Gene	Forward primer	Reverse primer	Reference
DAL19_αγ	GCTCTCTCGTGATCGTTGCG	TGTACATTTCTAGTTGCGGCAC	In this paper
DAL31	GTGGCTATCGTTAGCAGCCA	AACATGATGCCAGACCCTCC	In this paper
DAL32	GACCAGCAGGCAGGTTACTT	AGTCTCGACTTCGTTGATTTGGA	In this paper
DAL33	GACCAGCAGGCAGGTTACTT	GTTCGAACTTCTGTGTCGTGT	In this paper
DAL34	AGAGGAAAGACCCAGATGAAGAG	ACTGGAGGTCTTATATCCAATTGAGT	In this paper
DAL35	GTGGGACTTATTGTTTTCTCCCC	TGGTCACCATGCCCTAATGT	In this paper

## Sheet: SupTS2_Primers_ - Supplemental1
Supplemental Table S2B 5’ RACE_primers
Transcript	Primer name	Sequence	Reference
DAL19_δ	5'RACE Outer control primer	GATCACCAATCCATTGCCGACTAT	Provided with FirstChoice® RLM-RACE Kit,Thermo Fisher Scientific, Vilnius, Lithuania.
DAL19_δ	5'RACE inner control primer	GAAGTAGATGGTGGGCAGGAAGAT	Provided with FirstChoice® RLM-RACE Kit,Thermo Fisher Scientific, Vilnius, Lithuania.
DAL19_δ	5'RACE gene specific outer primer	GTACAGGTGATGTCAAAACCGG	In this paper.
DAL19_δ	5'RACE gene specific inner primer	ATCCACATATTCGGCACACTTC	In this paper.
DAL19_γ	5'RACE Outer control primer	GATCACCAATCCATTGCCGACTAT	Provided with FirstChoice® RLM-RACE Kit,Thermo Fisher Scientific, Vilnius, Lithuania.
DAL19_γ	5'RACE inner control primer	GAAGTAGATGGTGGGCAGGAAGAT	Provided with FirstChoice® RLM-RACE Kit,Thermo Fisher Scientific, Vilnius, Lithuania.
DAL19_γ	5'RACE gene specific outer primer	TCCAACACAATGATGCTGCA	In this paper.
DAL19_γ	5'RACE gene specific inner primer	CCCTGCCCCTTCCTTTTAAG	In this paper.

## Sheet: SupTS2_Primers_ - Supplemental2
Supplemental Table S2C 3’RACE_primers
Transcript	Primer name	Sequence	Reference
DAL19_βγ	3' RACE gene specific outer primer	GTGGCTATCGTTAGCAGCCA	In this paper
DAL19_βγ	3' RACE outer control primer	GCGAGCACAGAATTAATACGACT	Provided with FirstChoice® RLM-RACE Kit,Thermo Fisher Scientific, Vilnius, Lithuania

## Sheet: SupTS2_Primers_ - Supplemental3
Supplemental Table2D qRT-PCR
Gene/Exon	Forward primer	Reverse primer	Reference
Histone2A	CGGGACAACAAGAAGAATCGTAT	CTCGTCATTCCGAACAGCAA	In this paper
Polyubiquitin	TGGTCGTACTCTGGCCGATTATA	ACACCTAGCGGCACACAGTTAA	Gyllenstrand et al. 2007
Actin	ATTGGGATGGAAGCTGCTG	CCCACCACTAAGCACAATG	Uddenberg et al. 2013
DAL19β	AGACTGTAACTGTCTTGGAGTG	GTAACCTGCCTGCTGGTC	In this paper
DAL19α	GCTCTCTCGTGATCGTTGCG	TCTTTCCTCTCACCATTCTCCAG	In this paper
DAL19 γ	CTTAAAAGGAAGGGGCAGGGA	TGTACATTTCTAGTTGCGGCAC	In this paper
DAL19 δ	CGGTTTTGACATCACCTG	CGATAGGAAGGGGATCTTATAC	Uddenberg et al. 2013

## Sheet: SupTS2_Primers_ - Supplemental4
Supplemental Table2E LAN-probes
Gene/ Exon	Probe sequence	Reference
Histone	TTGCACCAGAAGAACTCATGTT	In this paper
DAL19β	TGCACTCCAAGACAGTTACAGT	In this paper
DAL19α	AGCAATCAATCGGACTCTCGGA	In this paper
DAL19 γ	TTCCAACACAATGATGCTGCA	In this paper
DAL19 δ	AAGCTGGAGTACAGGTGATGT	In this paper

## Sheet: SupT3_core_sequences_ - Supplem
Supplemental Table S3 Core_sequences
Gene name	Core_name	Sequence type	MA_ID	Trinity_ID	Cloning and sanger sequencing	Accession nr
DAL1	DAL1_core	Core				X80902
DAL10	DAL10_core	Core				AF064080
DAL11	DAL11-2_core	Core				AF158540
DAL11	DAL11-1_core	Core				AF158539
DAL12	DAL12-2_core	Core				AF158542
DAL12	DAL12-1_core	Core				AF158541
DAL13	DAL13-2_core	Core				AF158544
DAL13	DAL13-1_core	Core				AF158543
DAL14	DAL14_core	Core				KC347012
DAl19	DAL19_core	Core				KC347015
DAL2	DAL2_core	Core				X79280
DAL21	DAL21_core	Core				KC347016
DAL22	DAL22_core	Core				KC347017
DAL23	DAL23_core	Core				KC347018
DAL3	DAL3_core	Core				X79281
DAL3	DAL3-2_core	Core				HQ176521
DAL32	DAL32B_core	Core	MA_138440g0010		yes	ERZ664233
DAL33	DAL33C_core	Core	MA_43075g0010		yes	ERZ664233
DAL33	DAL33A_core	Core	MA_43075g0010		yes	ERZ664233
DAL34	DAL34_core	Core	MA_95674g0010		yes	ERZ664233
DAL35	DAL35_core	Core	MA_175522g0010		yes	ERZ664233
DAL36	DAL36_core	Core	MA_9771g0010	comp26722_c0_seq1
DAL37	DAL37_core	Core	MA_18942g0010	comp76499_c0_seq1
DAL38	DAL38_core	Core	MA_20180g0010	comp66848_c0_seq1
DAL39	DAL39_core	Core	MA_20393g0010	comp88431_c0_seq1
DAL4	DAL4_core	Core				KC347013
DAL40	PaMADS10_core	Core	MA_10432817g0010	comp95687_c0_seq12
DAL40	JTL_core	Core				EU332978
DAL41	MA_57186g0010	MADS	MA_57186g0010
DAL5	DAL5_core	Core				KC347011
DAL6	DAL6_core	Core				KC347010
DAL9	PaSOC1_core	Core				KM516089	CATGCAGGAAATTTTGGAAAAGTATCAAGACCGGTCGCAAGAAAGTGACATATCTGTTAGAACGAAAGAGCAAGATACTCAGTGTTTGAGACGAGAACTTGCAAATATGGAGGAAAAGATCAGGATTCTTGATTCAACACAAAGAAAAATGTTGGGGGAAGGGTTGACATCGTGTTCAATGGCAGAATTAAATAAGTTAGAGAGCCAAGCTGAACGAGGATTGAGCCATATACGGGCTCGAAAG
DAL9	DAL9_core	Core				KC347014
	MA_211156g0010	MADS	MA_211156g0010
	MA_121040g0010	MADS	MA_121040g0010
	MA_10256834g0010	MADS	MA_10256834g0010
	MA_162822g0010	MADS	MA_162822g0010
	MA_19296g0010	MADS	MA_19296g0010
	MA_30261g0010	MADS	MA_30261g0010
	MA_178733g0010	MADS	MA_178733g0010

## Sheet: SupT4_Accession_numbers_ - Supp
	Supplemental Table S4[Accession_numbers]
	Gene name	Accesion #	Species
	SEP1	NM_001125758	Arabidopsis thaliana
	SEP2	NM_111098	Arabidopsis thaliana
	SEP3	NM_102272	Arabidopsis thaliana
	SEP4	NM_126418	Arabidopsis thaliana
	AG	X53579	Arabidopsis thaliana
	AGL12	NM_105825	Arabidopsis thaliana
	AGL13	U20183	Arabidopsis thaliana
	AGL14	AK230464	Arabidopsis thaliana
	AGL15	NM_121382	Arabidopsis thaliana
	AGL16	NM_001339847	Arabidopsis thaliana
	AGL17	NM_001335805	Arabidopsis thaliana
	AGL18	NM_115599	Arabidopsis thaliana
	AGL19	AF312664	Arabidopsis thaliana
	AGL20	AY007726	Arabidopsis thaliana
	AGL21	NM_119955	Arabidopsis thaliana
	AGL24	AF005158	Arabidopsis thaliana
	AGL31	NM_001345662	Arabidopsis thaliana
	AGL6	M55554	Arabidopsis thaliana
	AGL71	NM_001203588	Arabidopsis thaliana
	AGL72	AY141221	Arabidopsis thaliana
	AGL8	NM_125484	Arabidopsis thaliana
	ANR1	Z97057	Arabidopsis thaliana
	AP1	NM_105581	Arabidopsis thaliana
	AP3	AY142590	Arabidopsis thaliana
	CAL	NM_102395	Arabidopsis thaliana
	FLC	NM_121052	Arabidopsis thaliana
	MAF1	NM_001334759	Arabidopsis thaliana
	MAF3	NM_001037067	Arabidopsis thaliana
	MAF4	AY231453	Arabidopsis thaliana
	MAF5	NM_001085330	Arabidopsis thaliana
	PI	NM_122031	Arabidopsis thaliana
	SHP1	NM_001203201	Arabidopsis thaliana
	SHP2	NM_180046	Arabidopsis thaliana
	STK	NM_001340646	Arabidopsis thaliana
	SVP	NM_001335800	Arabidopsis thaliana
	TT16	NM_203094	Arabidopsis thaliana
	LeAP3	AF052868	Lycopersicon esculentum
	LeMADS-MC	AY306154	Lycopersicon esculentum
	LeMADS-RIN	AF448522	Lycopersicon esculentum
	LeMADS1	AY294329	Lycopersicon esculentum
	LeSIMBP11	BT014220	Lycopersicon esculentum
	LeSIMBP18	BT013384	Lycopersicon esculentum
	LeSIMBP20	BT013126	Lycopersicon esculentum
	LeSIMBP7	AY306156	Lycopersicon esculentum
	LeTAG1	L26295	Lycopersicon esculentum
	LeTAGL1	AY098735	Lycopersicon esculentum
	LeTAGL11	AY098736	Lycopersicon esculentum
	LeTAGL12	AY098737	Lycopersicon esculentum
	LeTM29	AJ302015	Lycopersicon esculentum
	LeTM3	X60756	Lycopersicon esculentum
	LeTM4	X60757	Lycopersicon esculentum
	LeTM5	X60480	Lycopersicon esculentum
	LeTM6	X60759	Lycopersicon esculentum
	LeTM8	X60760	Lycopersicon esculentum
	DAL1	X80902	Picea abies
	DAL10	AF064080	Picea abies
	DAL11	AF158539	Picea abies
	DAL12	AF158541	Picea abies
	DAL13	AF158543	Picea abies
	DAL14	KC347012	Picea abies
	DAL19	KC347015	Picea abies
	DAL19	Bbeta	Picea abies
	DAL19	Aalpha	Picea abies
	DAL19	Balpha	Picea abies
	DAL2	X79280	Picea abies
	DAL21	KC347016	Picea abies
	DAL22	KC347017	Picea abies
	DAL23	KC347018	Picea abies
	DAL3	X79281	Picea abies
	DAL31		Picea abies
	DAL32		Picea abies
	DAL33		Picea abies
	DAL34		Picea abies
	DAL35		Picea abies
	DAL36		Picea abies
	DAL37		Picea abies
	DAL38		Picea abies
	DAL39		Picea abies
	DAL4	KC347013	Picea abies
	DAL40/JTL	EU332978	Picea abies
	DAL41
	DAL5	KC347011	Picea abies
	DAL6	KC347010	Picea abies
	DAL9	KC347014	Picea abies
	PrMADS1	AF023615	Pinus radiata
	PrMADS2	U42400	Pinus radiata
	PrMADS3	U76726	Pinus radiata
	PrMADS4	U90345	Pinus radiata
	PrMADS5	U90346	Pinus radiata
	PrMADS6	U90347	Pinus radiata
	PrMADS8	U90349	Pinus radiata
	PrMADS9	U90344	Pinus radiata

## Sheet: SupT5 _Acrocona expression_ - S
Supplemental Table S5 Amplification of DAL19 α-, β-, δ-, γ-containing transcripts
Sample	DAL19_α	DAL19_β	DAL19_δ	DAL19_γ
Apical non-cone-setting shoot_A	_	_	_	_
Apical non-cone-setting shoot_B	_	_	_	_
Apical non-cone-setting shoot_C	_	_	_	_
Basal non-cone-setting shoot_A	_	_	_	_
Basal non-cone-setting shoot_B	_	_	_	_
Apical cone-setting shoot_A	++	+/-	+++	+

[truncated: 1 more sheets: SupT_diff_exp_ - Supplemental T]
